# Supplementary material
Source: Springer Nature journal article supplement (https://www.springermedizin.de/resource/supplementary/12968_2012_2645_MOESM3_ESM.pdf/9582400)

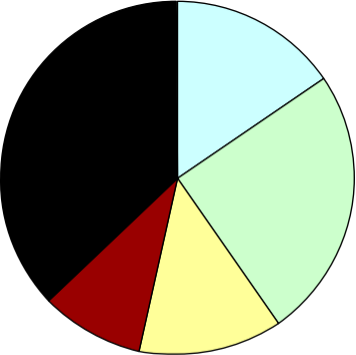

**Lipid Apheresis Group (N=32 arteries)**

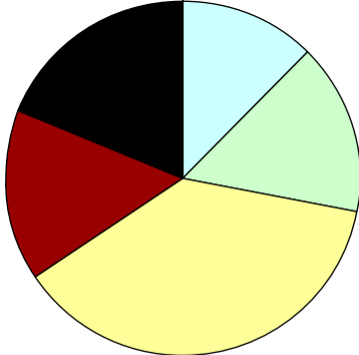

**Control Group (N=32 arteries)**

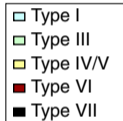

Supplement: MOESM3 [file 9582400]
